# Supplementary material for: Rapid synthesis of a flower-like ZnO/rGO/Ag micro/nano-composite with enhanced photocatalytic performance by a one-step microwave method
Source: Royal Society of Chemistry journal article supplement (doi:10.1039/c4ra09695a), 2014-10-31
Supplement: c4ra09695a1.pdf [file c4ra09695a1.pdf]

## Supporting Information

### Rapid Synthesis of Flower-like ZnO/rGO/Ag micro/nano-composite with Enhanced Photocatalytic Performance by One-Step Microwave Method

Alan Meng<sup>a</sup>, Jian Shao<sup>a</sup>, Xiaoyan Fan<sup>c</sup>, Junhu Wang<sup>d</sup>, Zhenjiang Li<sup>b,\*</sup>

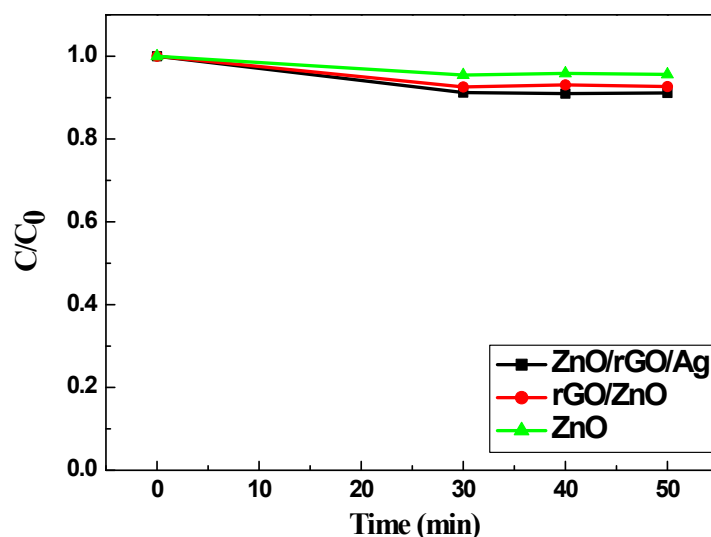

**Fig. S1** Adsorption experiments

The adsorption experiment was done for 30 min, 40 min and 50 min in dark, respectively. The results show in Fig S1. It can be found that the adsorption rate was no more than 8.5% and the adsorption of photocatalyst reached saturation after adsorption experiment was done for 30 min in dark.
